# Supplementary material for: Large-Scale Transcriptome Analysis of Retroelements in the Migratory Locust, Locusta migratoria
Source: PLoS One. 2012 Jul 6;7(7):e40532. doi: 10.1371/journal.pone.0040532 (PMC3391268; doi:10.1371/journal.pone.0040532)
Supplement: Table S1 — Random validation of transcriptome assemblies by cloning and Sanger sequencing of RT-PCR products. (XLS) [file pone.0040532.s005.xls]

## Sheet: Sheet1
Table S1. Random validation of transcriptome assemblies by cloning and Sanger sequencing of RT-PCR products.
Reads	Retroelements	%id	Insert	Mismatches	Gap openings	E-value
			Length (BP)
B07_AC05040358.449H	REP449	91.84	294	13	1	4e-111
B08_AC05040359.703H	REP703	98.75	401	5	0	0
B11_AC05040362.1379H	RE1379	99.02	307	3	0	2e-168
F04_AC05040343.1361H	REP1361	99.07	321	3	0	9e-177
F09_AC05040348.1094H	REP1094	93.79	419	24	0	1e-175
H06_AC05040349.561H	REP561	98.41	314	5	0	8e-168
H09_AC05040352.885H	REP885	96.36	302	8	0	1e-145
H11_AC05040354.1357H	REP1357	98.07	311	6	0	1e-163
H12_AC05040355.743H	REP743	98.19	331	6	0	1e-175
